# Supplementary material for: Selection of Lactiplantibacillus Strains for the Production of Fermented Table Olives
Source: MDPI journal article supplement (doi:10.3390/microorganisms10030625), 2022-03-15
Supplement: s1 [file s1]

**Title**

Selection of *Lactiplantibacillus* strains for the production of fermented table olives

**Authors**

Teresa Zotta <sup>1</sup>, Marilisa Giavalisco <sup>1</sup>, Eugenio Parente <sup>1,\*</sup>, Gianluca Picariello <sup>2</sup>, Francesco Siano <sup>2</sup>, Annamaria Ricciardi <sup>1</sup>

**Affiliations**

<sup>1</sup> Scuola di Scienze Agrarie, Alimentari, Forestali ed Ambientali (SAFE), Università degli Studi della Basilicata, 85100 Potenza, Italy; <sup>2</sup> Istituto di Scienze dell'Alimentazione-CNR, 83100 Avellino, Italy

\* Corresponding author

Prof. Eugenio Parente

E-mail: eugenio.parente@unibas.it Tel.: +39-0971-205561

**Table S1.** Reaction mixture and PCR-program for the amplification of partial 16S rRNA gene.

| Reagents                               | Reaction mixture concentration (50 $\mu$ L) | Amplification program *                                                                                  |
|----------------------------------------|---------------------------------------------|----------------------------------------------------------------------------------------------------------|
| Deionized water                        | -                                           | Initial denaturation: 95°C for 5 minutes                                                                 |
| Reaction buffer (WonderTaq, Euroclone) | 1x                                          |                                                                                                          |
| Primer forward 27F-ND                  | 0.5 $\mu$ M                                 | 30 cycle of: denaturation (95°C, 45 sec.), annealing (54°C, 45 seconds) and extension (72°C, 45 seconds) |
| Primer reverse 1492R-ND-L              | 0.5 $\mu$ M                                 |                                                                                                          |
| Taq (WonderTaq, Euroclone)             | 0.025U/ $\mu$ L                             |                                                                                                          |
| DNA                                    | 50 ng/ $\mu$ L                              | Final extension: 72°C for 7 minutes                                                                      |

\* PCR was carried out in a T100™ Thermal Cycler Bio-Rad (Bio-Rad Laboratories Srl, Segrate, Milan, Italy); PCR products (1535 bp) were separated (90 min at 100 V) on 1.5% w/v agarose gel, stained with 0.05  $\mu$ L/mL of GelRed™ (10,000x in water; Botium Inc., Fremont, California) and visualized using GelDoc XR system (Bio-Rad Laboratories).

**Table S2.** List of genes involved in phenolic compound metabolism, used to verify the occurrence in publicly available genomes of *Lactiplantibacillus paraplantarum*, *Lpb. plantarum* and *Lpb. pentosus*.

| Gene annotation                                                    | COG categories* | Strain                           | Accession n. | Locus tag (symbol)                                      | Size (bp/aa)   | References  |
|--------------------------------------------------------------------|-----------------|----------------------------------|--------------|---------------------------------------------------------|----------------|-------------|
| $\beta$ -glucosidase/6-phospho- $\beta$ -glucosidase               | G (COG 2723)    | <i>Lpb. plantarum</i> WCFS1      | CCC78348     | lp_0906 (pbg2)                                          | 1503 bp/500 aa | [1]         |
| aromatic acid carboxylase, subunit B                               | H (COG 0163)    | <i>Lpb. plantarum</i> WCFS1      | CCC77798     | lp_0271 ( <i>lpdB</i> )                                 | 564 bp/187 aa  | [1, 2]      |
| 3-octaprenyl-4-hydroxybenzoate carboxy-lyase, UbiD family          | H (COG 0043)    | <i>Lpb. plantarum</i> WCFS1      | CCC80016     | lp_2945 ( <i>lpdC</i> )                                 | 1473 bp/490 aa | [1-3]       |
| aromatic acid carboxylase, subunit D                               | -               | <i>Lpb. plantarum</i> WCFS1      | CCC77799     | lp_0272 ( <i>lpdD</i> )                                 | 411 bp/136 aa  | [1, 2]      |
| phenolic acid decarboxylase                                        | Q (COG 3479)    | <i>Lpb. plantarum</i> WCFS1      | CCC80619     | lp_3665 ( <i>padA</i> )                                 | 537 bp/178 aa  | [1, 4]      |
| transcriptional regulator of phenolic acid metabolism, PadR family | K (COG 1695)    | <i>Lpb. plantarum</i> WCFS1      | CCC80618     | lp_3664 ( <i>padR</i> )                                 | 546 bp/181 aa  | [1]         |
| tannase (tannin acyl hydrolase)                                    | I (COG 0657)    | <i>Lpb. plantarum</i> WCFS1      | CCC80022     | lp_2956<br>( <i>tanLp1</i> , <i>tanB<sub>Lp</sub></i> ) | 1410 bp/469 aa | [1-3, 5, 6] |
| hypothetical protein<br>(with tannase-like activity)               | -               | <i>Lpb. plantarum</i> ATCC 14917 | KRL35904     | HMPREF0531_11477<br>( <i>tanA<sub>Lp</sub></i> )        | 1881 bp/626 aa | [1, 6-8]    |
| carboxylesterase                                                   | Q (COG 1647)    | <i>Lpb. plantarum</i> WCFS1      | CCC78257     | lp_0796                                                 | 750 bp/249 aa  | [5]         |
| esterase                                                           | I (COG 0657)    | <i>Lpb. plantarum</i> WCFS1      | CCC80020     | lp_2953                                                 | 750 bp/249 aa  | [2]         |
| alpha/beta hydrolase                                               | I (COG 0657)    | <i>Lpb. plantarum</i> JDM1       | WP_015825406 | JDM1_1092                                               | 885 bp/295 aa  | [6, 9]      |

\* G: carbohydrate transport and metabolism; H: coenzyme transport and metabolism; Q: secondary metabolites biosynthesis, transport and catabolism; K: transcription; I: Lipid transport and metabolism. In bracket COG family.

**Table S3.** Exopolysaccharides (EPS) production and antimicrobial activity of strains.

| EPS production |                    |                    |                    | Antimicrobial activity            |                   |
|----------------|--------------------|--------------------|--------------------|-----------------------------------|-------------------|
| Strains        | G-MRS <sup>a</sup> | M-MRS <sup>a</sup> | S-MRS <sup>a</sup> | <i>Y. lipolytica</i> <sup>b</sup> | halo <sup>c</sup> |
| B15 (Lpl)      | +                  | +                  | +                  | CNRZ1890 (Lpl)                    | 23.0              |
| 38AA (Lpl)     | +                  | +                  | +                  | WCFS1 (Lpl)                       | 18.1              |
| B7N23 (Lpl)    | +                  | +                  | +                  | MT2D6S (Lpl)                      | 18.1              |
| MTD12L (Lpl)   | +                  | +                  | +                  | MT2D7S (Lpl)                      | 17.9              |
| MTNTA3S (Lpl)  | +                  | +                  | +                  | MTC13L (Lpl)                      | 17.2              |
| MT2D6S (Lpl)   | +                  | +                  | +                  | 1513 (Lpl)                        | 13.1              |
| MT2D7S (Lpl)   | +                  | +                  | +                  | 872 (Lpl)                         | 13.4              |
| MTC13L (Lpl)   | +                  | +                  | +                  | 4TP (Lpe)                         | 19.0              |
| MT2S (Lpl)     | +                  | +                  | +                  | 954 (Lpl)                         | 20.3              |
| MTF13S (Lpl)   | +                  | +                  | +                  | 4TG (Lpe)                         | 15.0              |
| MTF1L (Lpl)    | +                  | +                  | +                  | O4 (Lpl)                          | 8.6               |
| MTF28L (Lpl)   | +                  | +                  | +                  | O19 (Lpe)                         | 12.1              |
| MTF9L (Lpl)    | +                  | +                  | +                  | O20 (Lpe)                         | 14.5              |
| 2TP (Lpe)      | +                  | +                  | +                  | OM53 (Lpe)                        | 11.6              |
| 5TP (Lpe)      | +                  | +                  | +                  | OM52 (Lpe)                        | 10.5              |
| O4 (Lpl)       | +                  | +                  | +                  |                                   |                   |
| O18 (Lpe)      | -                  | +                  | -                  |                                   |                   |
| O19 (Lple)     | +                  | +                  | +                  |                                   |                   |
| OM50 (Lpe)     | -                  | -                  | +                  |                                   |                   |
| OM53 (Lpe)     | -                  | -                  | +                  |                                   |                   |

<sup>a</sup> G-MRS, M-MRS, S-MRS: MRS with 20 g/L maltose (M-MRS), or 20 g/L glucose (G-MRS), or 50 g/L sucrose (S-MRS) as carbon source (+, EPS-positive strains; -, EPS-negative strains); <sup>b</sup> *Y. lipolytica*: inhibitory activity of strains against *Yarrowia lipolytica* YL-12 (Deferred Antagonism Assay [10]); <sup>c</sup> halo: the size of inhibition zone (mm) was measured with a caliper. In brackets: Lpl, *Lpb. plantarum*; Lpe, *Lpb. pentosus*.

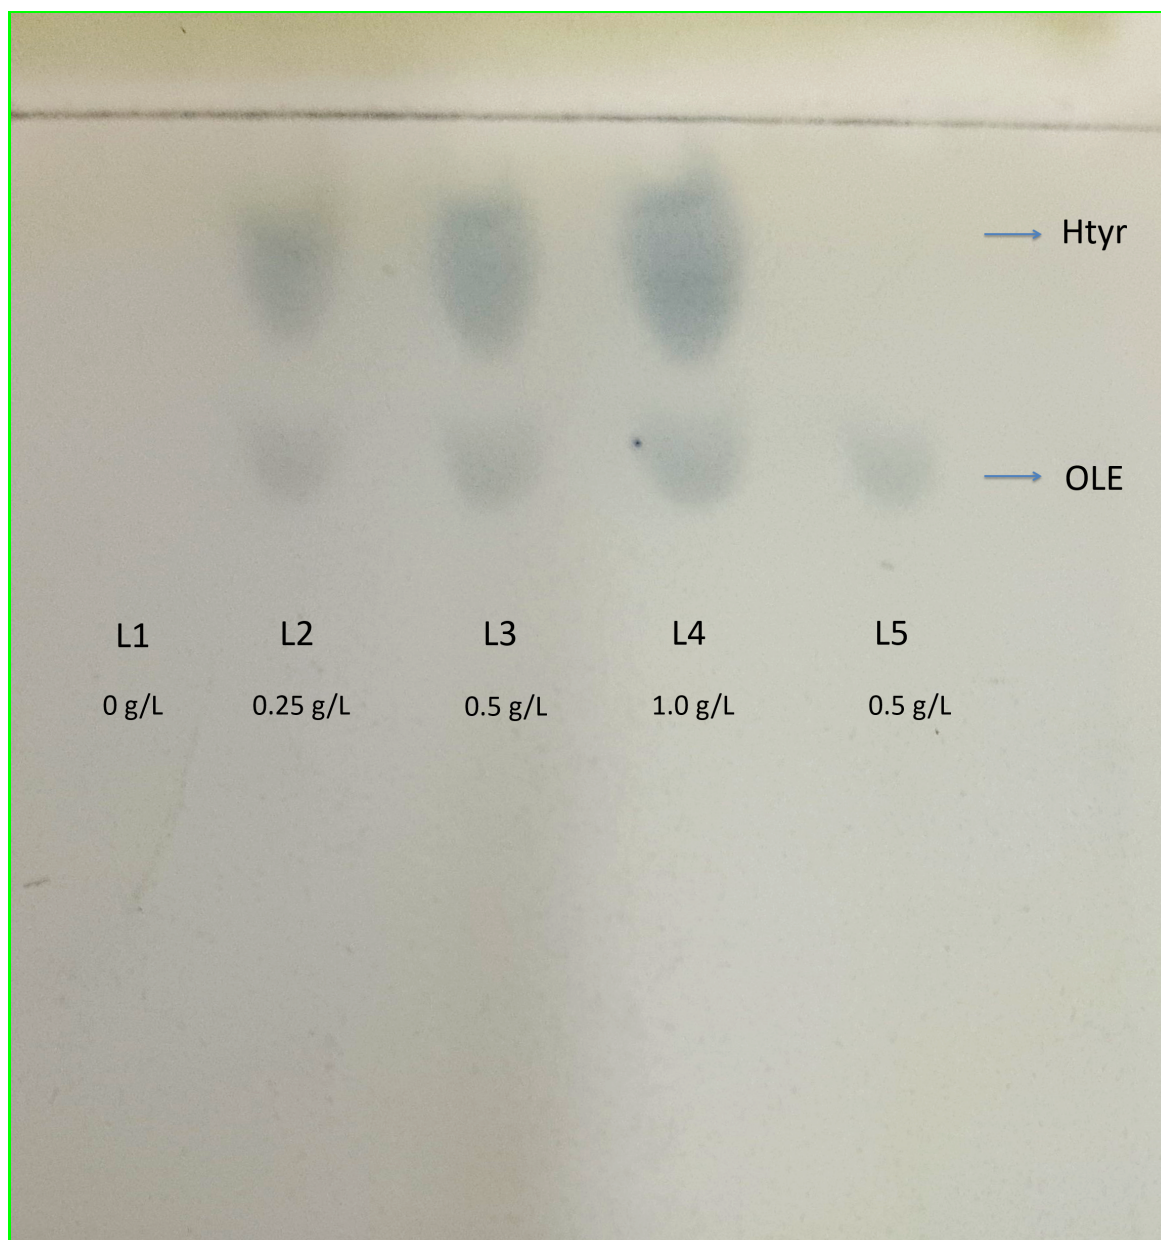

**Figure S1.** Thin Layer Chromatography (TLC) of MRS samples ([11]; *section 2.3*) unsupplemented (lane 1, L1) and supplemented with 0.25 g/L of oleuropein (OLE) and hydroxytyrosol (Htyr; L2), or with 0.5 g/L of OLE and Htyr (L3) or with 1 g/L of OLE and Htyr (L4) or only with 0.5 g/L of OLE (L5).

**Table S4.** Qualitative evaluation of oleuropein degradation and hydroxytyrosol formation using Thin Layer Chromatography (TLC).

| Strains                                                                                                                                                                                                                                                                                                                                                                                                                                                                                                 | Oleuropein (OLE)<br>TLC spot |                           | Hydroxytyrosol (Htyr)<br>TLC spot |                          |
|---------------------------------------------------------------------------------------------------------------------------------------------------------------------------------------------------------------------------------------------------------------------------------------------------------------------------------------------------------------------------------------------------------------------------------------------------------------------------------------------------------|------------------------------|---------------------------|-----------------------------------|--------------------------|
|                                                                                                                                                                                                                                                                                                                                                                                                                                                                                                         | presence                     | absence                   | presence                          | absence                  |
| <u>Lpb. paraplantarum</u> B7N26<br><u>Lpb. plantarum</u> WCFS1, ISLCPT68, PA20S, PE2S, B7N23, MT2A11S, B161, O1, O13; <i>Lpb. plantarum</i> subsp. <i>plantarum</i> B15, C17, 1069, DKO22, S85, UBS3, P1.5, MTNTA3S, DCU101, 38AA, FSM170, S12, MT2D6S, 954, UT2.1, US3.1, S2A19LPa; <i>Lpb. plantarum</i> subsp. <i>argenteratensis</i> CNRZ1890, DK36, FSL170, MTC13L<br><u>Lpb. pentosus</u> 2TP, 4TP, 4TG, 5TP, P13.3, OM24, OM53, OM52, OM62, OM50, OM13, OM14, OM35, O12, O17, O18, O19, O20, O24 | OLE degradation ability      |                           | Htyr formation ability            |                          |
| <u>Lpb. paraplantarum</u> MTG30L, MTG8L<br><u>Lpb. plantarum</u> MT2D3S, O4; <i>Lpb. plantarum</i> subsp. <i>plantarum</i> NCIMB8826, MTD12L, MT2D20S, ISLCPT57, MT2D7S, MT2D25L, MT2S, MTF13S, MTF1L, MTF28L, MTF9L, LM3; <i>Lpb. plantarum</i> subsp. <i>argenteratensis</i> NCIMB12120<br><u>Lpb. pentosus</u> LPL, O5, O11, O15                                                                                                                                                                     | OLE degradation ability      |                           |                                   | Htyr formation inability |
| <u>Lpb. paraplantarum</u> F10<br><u>Lpb. plantarum</u> subsp. <i>plantarum</i> 1505, 1513, 872, 1089, NCFB340                                                                                                                                                                                                                                                                                                                                                                                           |                              | OLE degradation inability |                                   | Htyr formation inability |

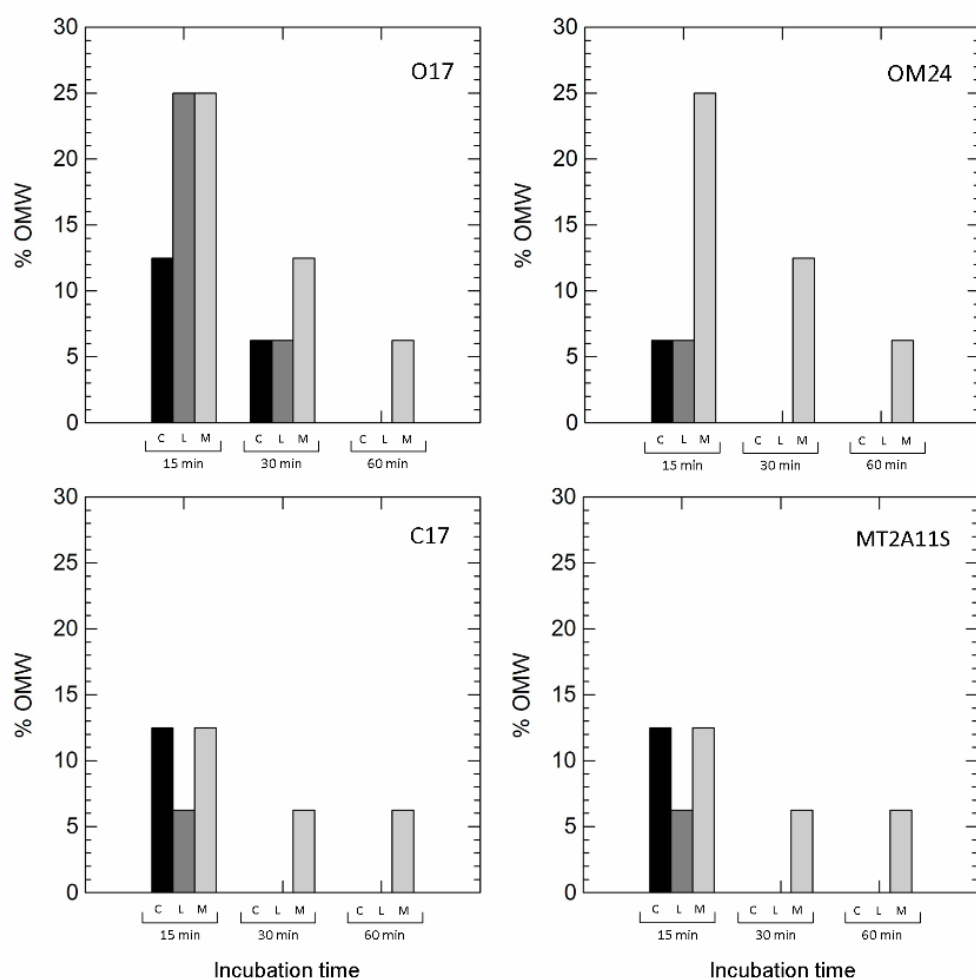

**Figure S2.** Survival of *Lpb. pentosus* O17, OM24 and *Lpb. plantarum* C17, MT2A11S to different concentrations (from 50% to 6.12% v/v) of *Leccino*, *Coratina* and *Cima di Melfi* OMWs after 15, 30, 60 and 120 minutes of incubation at 30°C.

**Table S5.** Occurrence analysis of genes involved in degradation and metabolism of phenolic compounds in *Lactiplantibacillus pentosus* genomes.

| Strains                                                                                                                                                                            | Sequencing status  | Isolation source                                        | <i>pbg</i> <sup>a</sup> | <i>padA</i> <sup>b</sup> | <i>padR</i> <sup>c</sup> | Carboxyl-esterase | <i>lpdB</i> <sup>d</sup> | <i>lpdC</i> <sup>e</sup> | <i>lpdD</i> <sup>f</sup> | Esterase | <i>tanA</i> <sup>g</sup> | <i>tanB</i> <sup>h</sup> |
|------------------------------------------------------------------------------------------------------------------------------------------------------------------------------------|--------------------|---------------------------------------------------------|-------------------------|--------------------------|--------------------------|-------------------|--------------------------|--------------------------|--------------------------|----------|--------------------------|--------------------------|
| <i>Lpb. pentosus</i> 1.2.11, 1.2.13, 1.2.7, 1.8.18, 1.8.6, 14.2.16, 14.2.3, 14.8.42, 3.2.36, 3.2.37, 3.8.24, 3.8.45, 7.2.11, 7.2.15, 7.2.20, 7.2.23, 7.8.2, 7.8.46, LA0445, MU0445 | Permanent draft    | Cucumber fermentation                                   |                         |                          |                          |                   |                          |                          |                          |          |                          |                          |
| <i>Lpb. pentosus</i> ZFM222                                                                                                                                                        | Finished           | Fermented vegetables                                    | 1                       | 1                        | 1                        | 1                 | 1                        | 1                        | 0                        | 1        | 1                        | 1                        |
| <i>Lpb. pentosus</i> SLC13                                                                                                                                                         | Finished           | Mustard pickles                                         |                         |                          |                          |                   |                          |                          |                          |          |                          |                          |
| <i>Lpb. pentosus</i> BGM48                                                                                                                                                         | Finished           | Olive fermentation                                      |                         |                          |                          |                   |                          |                          |                          |          |                          |                          |
| <i>Lpb. pentosus</i> 3.2.8                                                                                                                                                         | Permanent draft    | Cucumber fermentation                                   | 1                       | 1                        | 1                        | 1                 | 1                        | 1                        | 1                        | 1        | 1                        | 1                        |
| <i>Lpb. pentosus</i> 1.8.9                                                                                                                                                         | Permanent Draft    | Cucumber fermentation                                   | 1                       | 0                        | 1                        | 1                 | 1                        | 1                        | 0                        | 1        | 1                        | 1                        |
| <i>Lpb. pentosus</i> DSM 20314                                                                                                                                                     | Finished           | Corn silage                                             | 1                       | 1                        | 1                        | 1                 | 1                        | 1                        | 0                        | 1        | 1                        | 0                        |
| <i>Lpb. pentosus</i> FL0421                                                                                                                                                        | Permanent draft    | Temperate deciduous forest biome soil                   | 1                       | 1                        | 1                        | 1                 | 1                        | 1                        | 0                        | 1        | 0                        | 0                        |
| <i>Lpb. pentosus</i> KCA1                                                                                                                                                          | Permanent draft    | Vagina of a healthy Nigerian woman                      | 1                       | 1                        | 1                        | 1                 | 1                        | 1                        | 0                        | 1        | 0                        | 1                        |
| <i>Lpb. pentosus</i> O17                                                                                                                                                           | Draft (this study) | Brine from treated table olives ( <i>Cerignola</i> cv.) | 1                       | 1                        | 1                        | 0                 | 0                        | 1                        | 0                        | 1        | 1                        | 1                        |

<sup>a</sup> *pbg*:  $\beta$ -glucosidase; <sup>b</sup> *padA*: p-coumaric acid decarboxylase; <sup>c</sup> *padR*: Transcriptional regulator PadR; <sup>d</sup> *lpdB*: Gallate decarboxylase subunit B; <sup>e</sup> *lpdC*: Gallate decarboxylase subunit C;

<sup>f</sup> *lpdD*: Gallate decarboxylase subunit D; <sup>g</sup> *tanA*: Tannase subunit A; <sup>h</sup> *tanB*: Tannase subunit B. 1: gene presence; 0: gene absence.



## References

1. Carrasco, J.A.; Lucena-Padrós, H.; Brenes, M.; Ruiz-Barba, J.L. Expression of genes involved in metabolism of phenolic compounds by *Lactobacillus pentosus* and its relevance for table-olive fermentations. *Food Microbiol.* **2018**, *76*, 382–389. <https://doi.org/10.1016/j.fm.2018.06.020>.
2. Reverón, I.; Jiménez, N.; Curiel, J.A.; Peñas, E.; López de Felipe, F.; de las Rivas, B.; Muñoz, R. Differential gene expression by *Lactobacillus plantarum* WCFS1 in response to phenolic compounds reveals new genes involved in tannin degradation. *Appl. Environ. Microbiol.* **2017**, *83*, e03387-16. <https://doi.org/10.1128/AEM.03387-16>.
3. Jiménez, N.; Curiel, J.A.; Reverón, I.; de las Rivas, B.; Muñoz, R. Uncovering the *Lactobacillus plantarum* WCFS1 Gallate Decarboxylase Involved in Tannin Degradation. *Appl. Environ. Microbiol.* **2013**, *79*, 4253–4263. <https://doi.org/10.1128/AEM.00840-13>.
4. Rodríguez, H.; Landete, J.M.; Curiel, J.A.; de las Rivas, B.; Mancheño, J.M.; Muñoz, R. Characterization of the *p*-Coumaric acid decarboxylase from *Lactobacillus plantarum* CECT 748<sup>T</sup>. *J. Agric. Food Chem.* **2008**, *56*, 3068–3072. <https://doi.org/10.1021/jf703779s>.
5. Esteban-Torres, M.; Reverón, I.; Mancheño, J.M.; de las Rivas, B.; Muñoz, R. Characterization of a Feruloyl Esterase from *Lactobacillus plantarum*. *Appl. Environ. Microbiol.* **2013**, *79*, 5130–5136. <https://doi.org/10.1128/AEM.01523-13>.
6. Landete, J.M.; Plaza-Vinuesa, L.; Montenegro, C.; Santamaría, L.; Reverón, I.; de las Rivas, B.; Muñoz, R. The use of *Lactobacillus plantarum* esterase genes: A biotechnological strategy to increase the bioavailability of dietary phenolic compounds in lactic acid bacteria. *Int. J. Food Sci. Nutr.* **2021b**, *72*, 1035–1045. <https://doi.org/10.1080/09637486.2021.1900078>.
7. Jiménez, N.; Esteban-Torres, M.; Mancheño, J.M.; de Las Rivas, B.; Muñoz, R. Tannin degradation by a novel tannase enzyme present in some *Lactobacillus plantarum* strains. *Appl. Environ. Microbiol.* **2014**, *80*, 2991–2997. <https://doi.org/10.1128/AEM.00324-14>.
8. Pan, H.; Zhan, J.; Yang, H.; Wang, C.; Liu, H.; Zhou, H.; Zhou, H.; Lu, X.; Su, X.; Tian, Y. Improving the acid resistance of tannase TanBLp (AB379685) from *Lactobacillus plantarum* ATCC14917<sup>T</sup> by Site-Specific Mutagenesis. *Indian J. Microbiol.* **2021**, *62*, 96–102 <https://doi.org/10.1007/s12088-021-00983-x>.
9. Esteban-Torres, M.; Landete, J.M.; Reverón, I.; Santamaría, L.; de las Rivas, B.; Muñoz, R. A *Lactobacillus plantarum* esterase active on a broad range of phenolic esters. *Appl. Environ. Microbiol.* **2015**, *81*, 3235–3242. <https://doi.org/10.1128/AEM.00323-15>.
10. Parente, E.; Grieco, S.; Crudele, M.A. Phenotypic diversity of lactic acid bacteria isolated from fermented sausages produced in Basilicata (Southern Italy). *J. Appl. Microbiol.* **2001**, *90*, 943–952. <https://doi.org/10.1046/j.1365-2672.2001.01328.x>.
11. Ciafardini, G.; Marsilio, V.; Lanza, B.; Pozzi, N. Hydrolysis of oleuropein by *Lactobacillus plantarum* strains associated with olive fermentation. *Appl. Environ. Microbiol.* **1994**, *60*, 4142–4147. <https://doi.org/10.1128/aem.60.11.4142-4147.1994>.
